# Supplementary material for: MIL-100(Fe) Sub-Micrometric Capsules as a Dual Drug Delivery System
Source: MDPI journal article supplement (doi:10.3390/ijms23147670), 2022-07-12
Supplement: s1 [file s1]

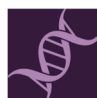

## Supporting Information

### MIL-100(Fe) sub-micrometric capsules as a dual drug delivery system

Marina Paiva Abuçafy, Regina Celia Galvão Frem, Giulia Polinário, Fernando Rogério Pavan, Heng Zhao, Angelika Mielcarek, Cédric Boissière\*, Christian Serre\*, and Leila Aparecida Chiavacci\*

#### S1. Supplemental Experimental Procedures

##### Synthesis of MIL-100(Fe) NPs.

In order to prepare MIL-100 capsules, preformed MIL-100(Fe) NPs were synthesized separately in ethanolic suspension. MIL-100(Fe) NPs were synthesized according to the procedure previously reported.<sup>[1]</sup> Iron (III) nitrate nonahydrate and trimesic acid were dissolved in distilled water and kept stirring at 60 °C during 48 h. The as-synthesized MIL-100(Fe) NPs were washed with water and ethanol. The MIL-100(Fe) NPs were stored in EtOH at a concentration of 1 mg·mL<sup>-1</sup>.

##### Dynamic light scattering (DLS)

Dynamic light scattering (DLS) size distribution was performed using a Zetasizer Nano ZS from Malvern, UK. 1 mg of MIL-100(Fe) material was placed in 1 mL of water and the sample was stirred for 5 min. The sample suspension was transferred to the quartz cuvette cell to acquire the measurements.

##### UV-vis spectroscopy- Calibration curve model of methotrexate.

A stock solution was prepared by dissolving 10 mg of MTX in required of 0.1 M HCl and diluting to 100 mL with ultrapure water and PBS. Aliquots were extracted from the stock to obtain diluted solutions containing MTX in the concentrations (µg·mL<sup>-1</sup>): 1.25 µg·mL<sup>-1</sup>, 2.5 µg·mL<sup>-1</sup>, 5 µg·mL<sup>-1</sup>, 7.5 µg·mL<sup>-1</sup>, 10 µg·mL<sup>-1</sup>, 12.5 µg·mL<sup>-1</sup>, 15 µg·mL<sup>-1</sup>, 17.5 µg·mL<sup>-1</sup> and 20 µg·mL<sup>-1</sup>. The standard solutions were analyzed using an Agilent Cary 60 spectrophotometer. Absorbance spectra were collected in the range of 200 - 800 nm with a resolution of 1 nm and scan speed of 300 nm·min<sup>-1</sup>.

##### UV-vis spectroscopy- Calibration curve model of collagenase.

A stock solution of collagenase in ultrapure water and PBS was prepared in a 30 mL volumetric flask. Aliquots were extracted from the stock to obtain diluted solutions containing collagenase in the concentrations (µg·mL<sup>-1</sup>): 30 µg·mL<sup>-1</sup>, 60 µg·mL<sup>-1</sup>, 90 µg·mL<sup>-1</sup>, 120 µg·mL<sup>-1</sup>, 150 µg·mL<sup>-1</sup> and 180 µg·mL<sup>-1</sup>. The standard solutions were analyzed using an Agilent Cary 60 spectrophotometer. Absorbance spectra were collected in the range of 200 - 800 nm with a resolution of 1 nm and scan speed of 300 nm·min<sup>-1</sup>.

#### S2. Characterization of MOFs

**Table S1:** Kinetic Model Equations, where  $Q_t$  is the quantity of the drug released at time  $t$ ,  $K$  is the release rate constant, and  $\eta$  is the diffusional exponent that characterizes the best fitted release mechanism.

| Kinetic models   | Equations                                   |
|------------------|---------------------------------------------|
| Zero order       | $Q_t = Q_0 - K_0 t$                         |
| First order      | $\log Q_t = \log Q_0 - \frac{K_1 t}{2.303}$ |
| Korsmeyer-Peppas | $\log Q_t = \log K + \eta \log t$           |
| Higuchi          | $Q_t = K_h \sqrt{t}$                        |

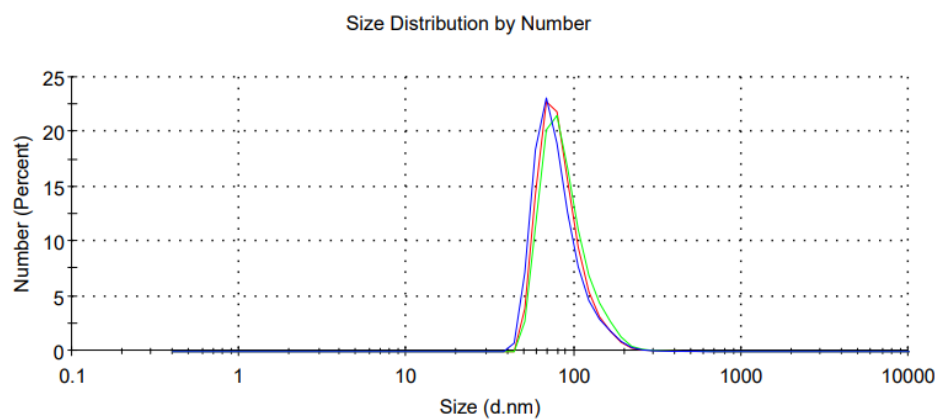

**Figure S1.** Dynamic light scattering (DLS) size distribution of MIL-100(Fe) NPs.

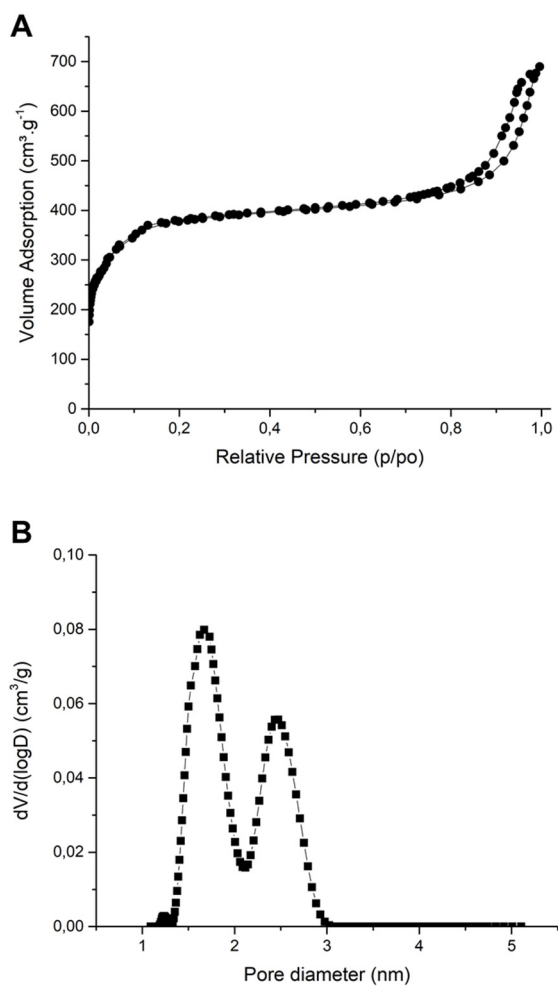

**Figure S2.** (A)  $N_2$  adsorption- desorption isotherms (B) and BJH pore size distribution curves of MIL-100(Fe) NPs at 77 K ( $P_0 = 1$  atm).

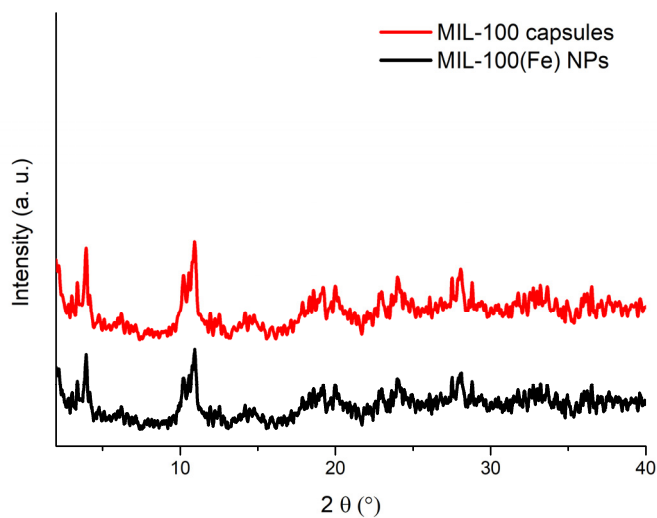

**Figure S3.** Powder XRD diagram of MIL-100(Fe) NPs (black line) and MIL-100 capsules (red line). The XRD patterns are in agreement with that reported in the literature.[1,2]

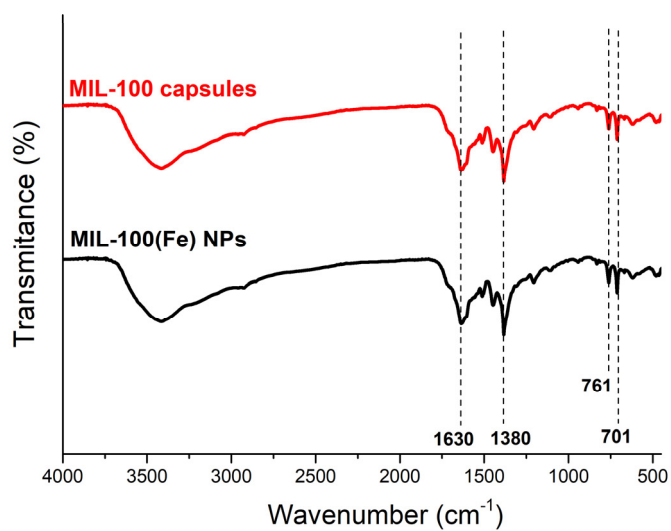

**Figure S4.** FT-IR spectrum of MIL-100(Fe) NPs (black line) and MIL-100 capsules (red line).

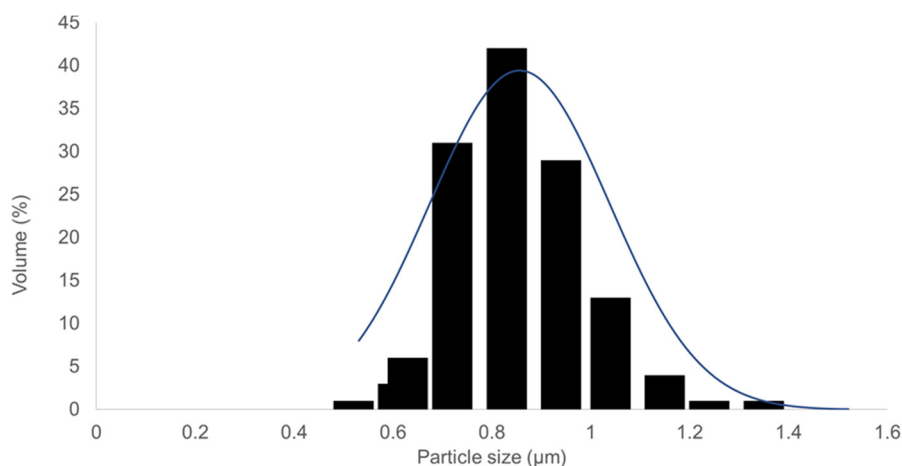

**Figure S5.** Particle size distribution of MIL-100 capsules.

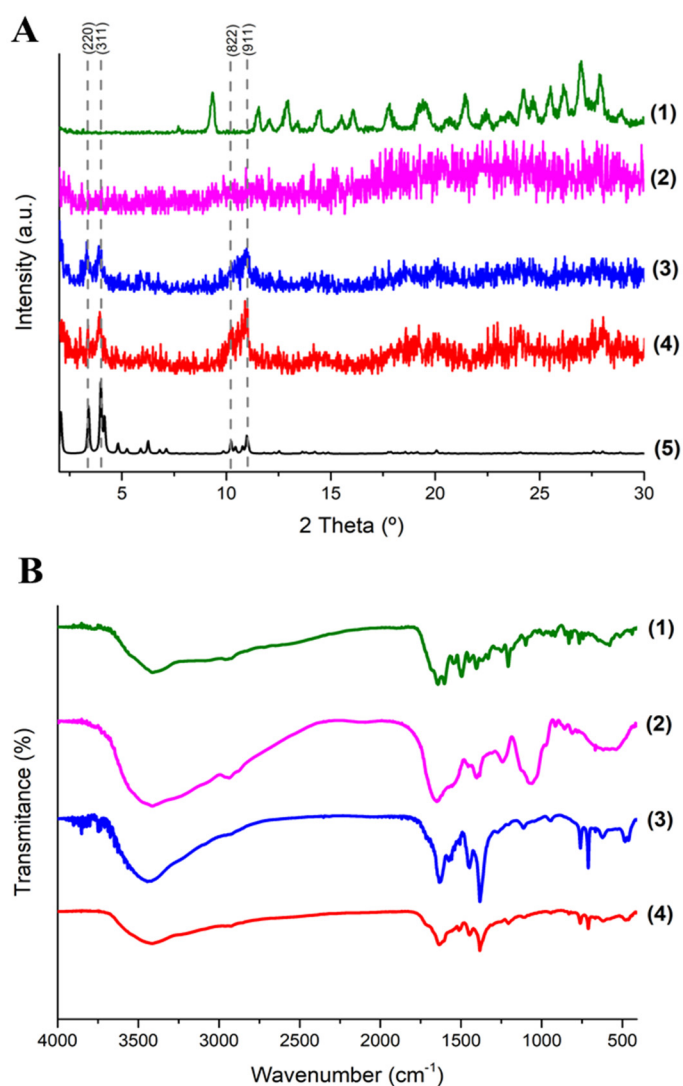

**Figure S6.** (A) PXRD patterns of MTX (1), collagenase (2), MTX@COL@MIL-100 capsule (3), MIL-100 capsule (4) and simulated MIL-100(Fe) NPs (5). (B) FTIR spectra of MTX (1), collagenase (2), MTX@COL@MIL-100 capsule (3) and MIL-100 capsule (4).

**Table S2:** Textural properties of MIL-100 capsules before and after MTX and collagenase encapsulation.

| Sample                                                          | MIL-100 capsule | MTX@MIL-100 capsule | MTX@COL@MIL-100 capsule |
|-----------------------------------------------------------------|-----------------|---------------------|-------------------------|
| BET surface area (m <sup>2</sup> .g <sup>-1</sup> )             | 1613            | 629                 | 285                     |
| T-plot external surface area (m <sup>2</sup> .g <sup>-1</sup> ) | 213             | 125                 | 120                     |
| Total pore volume (cm <sup>3</sup> .g <sup>-1</sup> )           | 0.85            | 0.32                | 0.21                    |

### S3. Methotrexate and Collagenase loading and release from MOF capsule

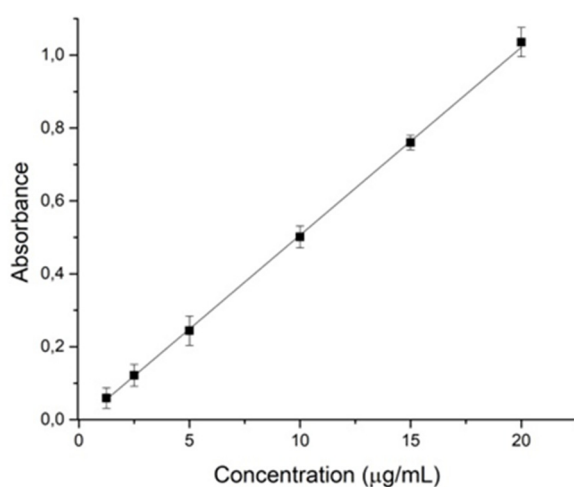**Figure S7.** Calibration curve of methotrexate in water (0.1M HCl). The analytical curve obtained was:  $y = 0.0519x - 0.0114$  and the correlation coefficient ( $R^2$ ) was 0.9997, indicating linearity.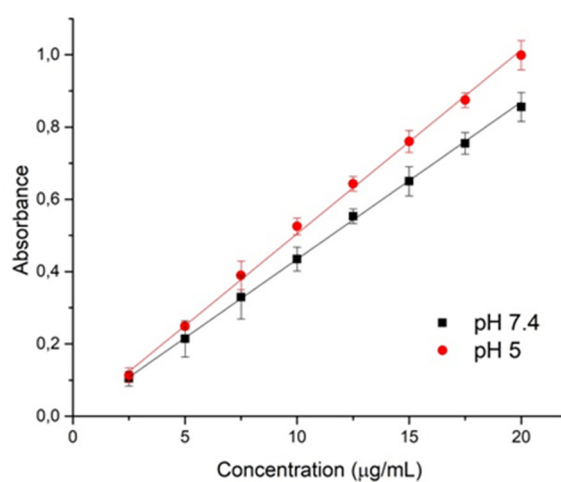**Figure S8.** Calibration curve of methotrexate in PBS pH 7.4 and PBS pH 5. The analytical curve obtained in pH 7.4 was:  $y = 0.0439x - 0.0325$  and the correlation coefficient ( $R^2$ ) 0.9971, while in pH 5 was:  $y = 0.0506x + 0.0026$  and the correlation coefficient ( $R^2$ ) 0.9945.

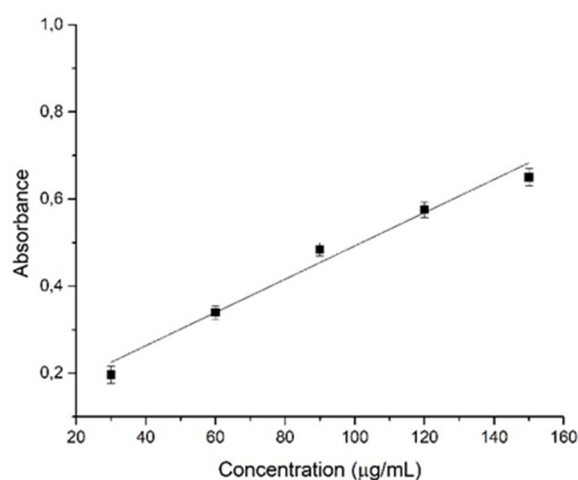

**Figure S9.** Calibration curve of collagenase in water. The analytical curve obtained was:  $y = 0.0038x + 0.0994$  and the correlation coefficient ( $R^2$ ) was 0.9902, indicating linearity.

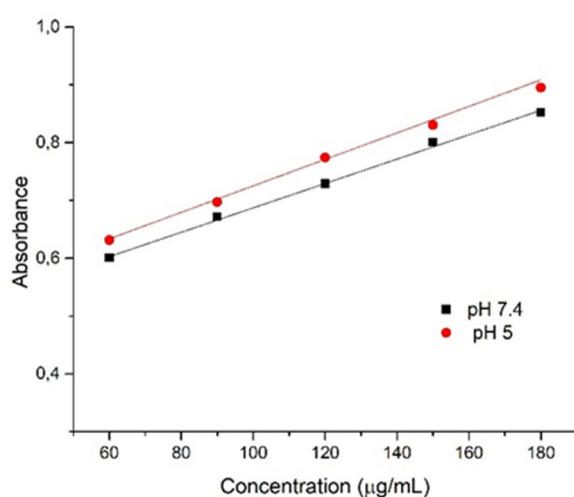

**Figure S10.** Calibration curve of collagenase in PBS pH 7.4 and PBS pH 5. The analytical curve obtained in pH 7.4 was:  $y = 0.002x + 0.4858$  and the correlation coefficient ( $R^2$ ) 0.9927, while in pH 5 was:  $y = 0.0021x + 0.5237$  and the correlation coefficient ( $R^2$ ) 0.9914, indicating linearity.

**Table S3.** MTX release kinetics from MIL-100 NPs and MIL-100 capsules in PBS pH 7.4.

| Mathematical model | MIL-100(Fe) NPs |                  | MIL-100 capsules |                  |
|--------------------|-----------------|------------------|------------------|------------------|
|                    | $r^2$           | Release exponent | $r^2$            | Release exponent |
| Korsmeyer-Peppas   | 0.9909          | $\eta = 0.4944$  | 0.9989           | $\eta = 0.5468$  |
| Higuchi            | 0.8498          |                  | 0.7076           |                  |
| Hixson-crowell     | 0.8065          |                  | 0.7203           |                  |
| Primeira ordem     | 0.8838          |                  | 0.7021           |                  |
| Weibull            | 0.9838          | $b = 0.7460$     | 0.9644           | $b = 0.6602$     |

**Table S4.** MTX release kinetics from MIL-100(Fe) NPs and MIL-100 capsules in PBS pH 5,0.

| Mathematical model | MIL-100(Fe) NPs |                  | MIL-100 capsules |                  |
|--------------------|-----------------|------------------|------------------|------------------|
|                    | $r^2$           | Release exponent | $r^2$            | Release exponent |
| Korsmeyer-Peppas   | 0.9998          | $\eta = 0.4729$  | 0.9979           | $\eta = 0.4967$  |

|                |        |            |        |            |
|----------------|--------|------------|--------|------------|
| Higuchi        | 0.9353 |            | 0.8666 |            |
| Hixson-crowell | 0.6920 |            | 0.6920 |            |
| Primeira ordem | 0.6854 |            | 0.6854 |            |
| Weibull        | 0.9710 | b = 0.6870 | 0.9885 | b = 0.7412 |

**Table S5.** Collagenase release kinetics from MIL-100 capsules in PBS pH 7.4 and pH 5.0.

| Mathematical model | pH 7.4         |                  | pH 5.0         |                  |
|--------------------|----------------|------------------|----------------|------------------|
|                    | r <sup>2</sup> | Release exponent | r <sup>2</sup> | Release exponent |
| Korsmeyer-Peppas   | 0.9927         | $\eta = 0.8358$  | 0.9968         | $\eta = 0.4626$  |
| Higuchi            | 0.9250         |                  | 0.9257         |                  |
| Hixson-crowell     | 0.3333         |                  | 0.9862         |                  |
| Primeira ordem     | 0.4052         |                  | 0.9866         |                  |
| Weibull            | 0.9842         | b = 0.4699       | 0.9961         | b = 0.7241       |

## References

1. Horcajada, P.; Surblé, S.; Serre, C.; Hong, D.Y.; Seo, Y.K.; Chang, J.S.; Grenèche, J.M.; Margiolaki, I.; Férey, G. Synthesis and Catalytic Properties of MIL-100(Fe), an Iron(III) Carboxylate with Large Pores. *Chem. Commun.* **2007**, *100*, 2820–2822, doi:10.1039/b704325b.
2. PANCHAL, M.; NOUAR, F.; SERRE, C.; BENZAQUI, M.; SENE, S.; STEUNOU, N.; GIMÉNEZ MARQUÉS, M. Low Temperature Process for the Synthesis of Mof Carboxylate Nanoparticles 2018.
